# Supplementary material
Source: PubMed Central journal article supplement (PMC6022632)
Supplement: awy132_suppl_data.pdf [file awy132_suppl_data.pdf]

**Supplementary Table.** The overall neurochemical landscape of AD

| System        | System alterations and AD pathophysiology                                                                                                                                                                                                                                                                     | Receptors alterations                                                                                                                                                                                                                                                                                                                                                                                               | Ligand alterations                                                                                                                                                                                                                                                          | Interaction with the AChergic systems                                                                                                                                                                                                                                                                                                                                                                                                                                                                                                                                                                                                                                                                                                                                                                                                                                                                   |
|---------------|---------------------------------------------------------------------------------------------------------------------------------------------------------------------------------------------------------------------------------------------------------------------------------------------------------------|---------------------------------------------------------------------------------------------------------------------------------------------------------------------------------------------------------------------------------------------------------------------------------------------------------------------------------------------------------------------------------------------------------------------|-----------------------------------------------------------------------------------------------------------------------------------------------------------------------------------------------------------------------------------------------------------------------------|---------------------------------------------------------------------------------------------------------------------------------------------------------------------------------------------------------------------------------------------------------------------------------------------------------------------------------------------------------------------------------------------------------------------------------------------------------------------------------------------------------------------------------------------------------------------------------------------------------------------------------------------------------------------------------------------------------------------------------------------------------------------------------------------------------------------------------------------------------------------------------------------------------|
| Glutamate     | Increased sensitivity and/or activity of the GLUergic system to A $\beta$ . GLUergic dynamic alterations overtime are tightly linked to A $\beta$ -induced toxic pathways (GLUergic excitotoxicity).                                                                                                          | Post-synaptic NMDAr induce the LTP, which is essential for synaptic transmission/plasticity. Increased sensitivity / activity of NMDAr with a vicious cycle in with an abnormal turnover of the receptor leads to A $\beta$ -induced toxic pathways as those involving the PrPc-Fyn-k and the caspase3-mediated apoptotic signalling (Um <i>et al.</i> , 2012)                                                      | GLU uptake/recycling mechanisms, at the synaptic cleft, become progressively impaired during AD with increased both background and action-induced synaptic levels                                                                                                           | <p>There is a dual ACh-mediated regulation of GLU release:</p> <ul style="list-style-type: none"> <li>▪ presynaptic <math>\alpha 7</math> N may facilitates GLU release</li> <li>▪ M are associated to decreased both release and concentration of GLU in the synaptic cleft (Higley <i>et al.</i>, 2009).</li> </ul> <p>Moreover, <math>\alpha 7</math> N stimulation lead to internalization of NMDAr thus lowering GLUergic-mediated neuronal Ca<math>^{2+}</math> influx (Kim <i>et al.</i>, 2017). Early loss of presynaptic AChergic neurons is associated to a prolonged GLUergic excitatory response though an ineffective adaptive response consisting in a downregulation of the NMDAr (Um <i>et al.</i>, 2012)</p> <p>AChergic neurons express glutamatergic metabotropic receptor which, once activated in AChergic neurons, enhance the release of ACh (Ikonovic <i>et al.</i>, 2000).</p> |
| Serotonin     | Progressive serotonergic neuronal loss (i.e. rafe nuclei) (Beaulieu, 2012) and widespread impairment of serotonergic networks of the temporal-entorhinal cortex (Meltzer <i>et al.</i> , 1998). No definitive data are available on the relationship between serotonergic alteration and AD pathophysiology   | 5-HT 2A, 4 and 6 subtypes are upregulated as potential compensatory mechanism due to loss of serotonin and other neurochemical changes in CNS, during AD. Over stimulation of 5-HT 2A receptors lead to maladaptive GSK3-mediated pathways (Beaulieu, 2012) 5-HT6 activation, increases cAMP, activating the Fyn-k/ERK 1-2 axis which is associated to increased somatodendritic levels of hyperphosphorilated tau. | Progressive decline in both brain stem and cortical serotonin levels (Meltzer <i>et al.</i> , 1998)                                                                                                                                                                         | Cortical AChergic firing can be potentiated trough the blockade of 5-HT6 receptors, stimulating the Glu release and reducing the GABAergic inhibitory firing (Riemer <i>et al.</i> , 2003).                                                                                                                                                                                                                                                                                                                                                                                                                                                                                                                                                                                                                                                                                                             |
| Dopamine      | Spatiotemporal re-configuration of brain DAergic networks with concurrent mechanisms of up-downregulation (McNamara <i>et al.</i> , 2014). No definitive data are available on the relationship between serotonergic alteration and AD pathophysiology                                                        | Not totally disclosed yet. However, GSK3 is recognized as a key mediator in the subcellular integration of the DAergic transmission (Beaulieu <i>et al.</i> , 2004)                                                                                                                                                                                                                                                 | Controversial data have been reported so far even though a trend toward a progressive lowering of cerebral DA levels due to midbrain neuronal loss is likely to be the most probable scenario (Nobili <i>et al.</i> , 2017)                                                 | <p>AChergic projections finely regulate the presynaptic release of DA (Rice and Cragg, 2004), mainly through N.</p> <p>There is a striatal AChergic (both M and N) modulation of the DA release, particularly in the nucleus accumbens (Collins <i>et al.</i>, 2016).</p> <p>A AChergic-mediated cerebral loss of DA has been linked to impair mesolimbic, prefrontal and striatal circuits.</p> <p>AChergic-mediated cerebral loss of DA homeostasis may contribute to aberrant cells signaling as GSK3 overactivation leading to A<math>\beta</math> accumulation, neurofibrillary pathology and neuroinflammation (Beaulieu <i>et al.</i>, 2004).</p>                                                                                                                                                                                                                                                |
| Noradrenaline | There is a progressive NAergic degeneration and dysfunction overtime with extensive loss of NAergic terminals (Andres-Benito <i>et al.</i> , 2017) It is well known that a pre-cortical tau-deposition in the LC occurs (pre-tangle stage of AD). Given the widespread NAergic projections from LC to limbic, | Higher expression levels of hippocampal and amygdala $\alpha 2A$ NAergic post-synaptic receptor (representing a potential compensatory mechanism while enhancing dendrite sprouting)                                                                                                                                                                                                                                | Progressive decline in NA cortical levels mostly due to loss of cortical projections arising from neurons in the LC. Such a decline is initially compensated by upregulation of TH gene expression and NA transporter binding sites (Chalermpananupap <i>et al.</i> , 2013) | <p>Adrenergic modulation of hippocampal AChergic neurons, through <math>\alpha 2A</math> NAergic post-synaptic receptors. These receptors contribute to the recruitment of AChergic neuronal networks relevant in cognition (Andres-Benito <i>et al.</i>, 2017)</p> <p>Thus, brain regions, as hippocampi, receiving projections from the LC could lose a NAergic-mediated positive effect on the AChergic neuronal activation (Andres-Benito <i>et al.</i>, 2017).</p> <p>Whether AChergic neurons of basal forebrain modulate NAergic neurons of LC or its</p>                                                                                                                                                                                                                                                                                                                                        |

|            |                                                                                                                                                                                                                                                                                                                               |                                                                                                                                                      |                                                                                                                                                                                |                                                                                                                                                                                                                                                                                                                                                                                                                                                                                                                                                                                                                                                                                                                                                                                                                                                               |
|------------|-------------------------------------------------------------------------------------------------------------------------------------------------------------------------------------------------------------------------------------------------------------------------------------------------------------------------------|------------------------------------------------------------------------------------------------------------------------------------------------------|--------------------------------------------------------------------------------------------------------------------------------------------------------------------------------|---------------------------------------------------------------------------------------------------------------------------------------------------------------------------------------------------------------------------------------------------------------------------------------------------------------------------------------------------------------------------------------------------------------------------------------------------------------------------------------------------------------------------------------------------------------------------------------------------------------------------------------------------------------------------------------------------------------------------------------------------------------------------------------------------------------------------------------------------------------|
|            | prefrontal and entorhinal areas as well as to AChergic basal nuclei, a potential prominent role in early stages of AD cannot be ruled out (Andres-Benito <i>et al.</i> , 2017; Ehrenberg <i>et al.</i> , 2017)                                                                                                                |                                                                                                                                                      |                                                                                                                                                                                | cortical projections is still matter of debate.                                                                                                                                                                                                                                                                                                                                                                                                                                                                                                                                                                                                                                                                                                                                                                                                               |
| GABA       | Impaired inhibitory GABAergic firing that are essential to balance the glutamatergic and AChergic excitatory synaptic effect. No definitive data are available on the relationship between serotonergic alteration and AD pathophysiology                                                                                     | Down-regulation of GABA receptors in the temporal cortex associated to the glutamatergic excitotoxic cascade signatures (Limon <i>et al.</i> , 2012) | Progressive reduction of overall cerebral levels of GABA has been reported while recent works have shown increased levels of GABA in hippocampi (Rissman <i>et al.</i> , 2007) | GABAergic modulation of AChergic BF neurons, with a major inhibitory effect on the rate of ACh release.(Rissman <i>et al.</i> , 2007; Limon <i>et al.</i> , 2012)<br><br>Functional re-modelling of the GABAergic system occurs during AD displaying a regional-pattern modality. These changes could represent a set of compensatory mechanisms facing AChergic decline(Limon <i>et al.</i> , 2012)                                                                                                                                                                                                                                                                                                                                                                                                                                                          |
| Astrocytes | Astroglial progressive loss and morpho-functional shift to pro-inflammatory phenotype affect synaptic transmission and plasticity (Osborn <i>et al.</i> , 2016). Astrocytes provide a relevant contribution to hippocampal synaptic transmission and plasticity, through Ca <sup>2+</sup> - mediated intracellular signalling | n.a.                                                                                                                                                 | n.a.                                                                                                                                                                           | Astrocytes surface has a high density of both M and N receptors:<br><br>The stimulation of M leads to intracellular Ca <sup>2+</sup> elevations from the background level. This, in turn, positively impact on downstream cellular processes as LTP. Hence, the M receptors are essential for the spatial-temporal coordination of astrocytes with the post-synaptic activity (Takata <i>et al.</i> , 2011).<br><br>Recent evidences have shown that the astrocytic glutamate and serotonin synthesis and re-uptake may be regulated by AChergic stimulation <i>via</i> N receptors (Osborn <i>et al.</i> , 2016).<br><br>Astrocytic and microglial N receptors activate cell signalling involved in the stimulation of autophagic processes, including A $\beta$ oligomers, as well as modulating neuroinflammatory response (Vincent <i>et al.</i> , 2010). |

Abbreviation: GLU: Glutamate; CNS: central nervous system; AD: Alzheimer's disease; NMDAr: N-methyl-D-aspartate receptor; LTP: long-term potentiation; ACh: acetylcholine; N: nicotinic receptor; M: muscarinic receptor; 5-HT: 5-hydroxytryptamine; GSK3: glycogen synthase kinase-3; DA: dopamine; cAMP: Cyclic adenosine monophosphate; ERK1/2: extracellular signal-regulated kinase 1/2; PrPc: cellular prion protein; Fyn-k: Proto-oncogene tyrosine-protein kinase Fyn, member of the Src family of kinase; A $\beta$ : amyloid beta; LC: locus coeruleus; TH: tyrosine hydroxylase; GABA: Gamma-aminobutyric acid; n.a.: not applicable.

## References

- Andres-Benito P, Fernandez-Duenas V, Carmona M, Escobar LA, Torrejon-Escribano B, Aso E, et al. Locus coeruleus at asymptomatic early and middle Braak stages of neurofibrillary tangle pathology. *Neuropathol. Appl. Neurobiol.* 2017; 43: 373–392.
- Beaulieu J-M. A role for Akt and glycogen synthase kinase-3 as integrators of dopamine and serotonin neurotransmission in mental health. *J. Psychiatry Neurosci.* 2012; 37: 7–16.
- Beaulieu J-M, Sotnikova TD, Yao W-D, Kockeritz L, Woodgett JR, Gainetdinov RR, et al. Lithium antagonizes dopamine-dependent behaviors mediated by an AKT/glycogen synthase kinase 3 signaling cascade. *Proc. Natl. Acad. Sci. U. S. A.* 2004; 101: 5099–5104.
- Chalermphanupap T, Kinkead B, Hu WT, Kummer MP, Hammerschmidt T, Heneka MT, et al. Targeting norepinephrine in mild cognitive impairment and Alzheimer's disease. *Alzheimers. Res. Ther.* 2013; 5: 21.
- Collins AL, Aitken TJ, Greenfield VY, Ostlund SB, Wassum KM. Nucleus Accumbens Acetylcholine Receptors Modulate Dopamine and Motivation. *Neuropsychopharmacology* 2016; 41: 2830–2838.
- Ehrenberg AJ, Nguy AK, Theofilas P, Dunlop S, Suemoto CK, Di Lorenzo Alho AT, et al. Quantifying the accretion of hyperphosphorylated tau in the locus coeruleus and dorsal raphe nucleus: the pathological building blocks of early Alzheimer's disease. *Neuropathol. Appl. Neurobiol.* 2017; 43: 393–408.
- Higley MJ, Soler-Llavina GJ, Sabatini BL. Cholinergic modulation of multivesicular release regulates striatal synaptic potency and integration. *Nat. Neurosci.* 2009; 12: 1121–1128.
- Ikonomovic MD, Nocera R, Mizukami K, Armstrong DM. Age-related loss of the AMPA receptor subunits GluR2/3 in the human nucleus basalis of Meynert. *Exp. Neurol.* 2000; 166: 363–375.
- Kim SH, Kandiah N, Hsu J-L, Suthisisang C, Udommongkol C, Dash A. Beyond symptomatic effects: potential of donepezil as a neuroprotective agent and disease modifier in Alzheimer's disease. *Br. J. Pharmacol.* 2017; 174: 4224–4232.
- Limon A, Reyes-Ruiz JM, Miledi R. Loss of functional GABA(A) receptors in the Alzheimer diseased brain. *Proc. Natl. Acad. Sci. U. S. A.* 2012; 109: 10071–10076.
- McNamara CG, Tejero-Cantero A, Trouche S, Campo-Urriza N, Dupret D. Dopaminergic neurons promote hippocampal reactivation and spatial memory persistence. *Nat. Neurosci.* 2014; 17: 1658–1660.
- Meltzer CC, Smith G, DeKosky ST, Pollock BG, Mathis CA, Moore RY, et al. Serotonin in aging, late-life depression, and Alzheimer's disease: the emerging role of functional imaging. *Neuropsychopharmacology* 1998; 18: 407–430.
- Nobili A, Latagliata EC, Viscomi MT, Cavallucci V, Cutuli D, Giacobazzo G, et al. Dopamine neuronal loss contributes to memory and reward dysfunction in a model of Alzheimer's disease. *Nat. Commun.* 2017; 8: 14727.
- Osborn LM, Kamphuis W, Wadman WJ, Hol EM. Astroglialosis: An integral player in the pathogenesis of Alzheimer's disease.

Prog. Neurobiol. 2016; 144: 121–141.

Rice ME, Cragg SJ. Nicotine amplifies reward-related dopamine signals in striatum. *Nat. Neurosci.* 2004; 7: 583–584.

Riemer C, Borroni E, Levet-Trafit B, Martin JR, Poli S, Porter RHP, et al. Influence of the 5-HT<sub>6</sub> receptor on acetylcholine release in the cortex: pharmacological characterization of 4-(2-bromo-6-pyrrolidin-1-ylpyridine-4-sulfonyl)phenylamine, a potent and selective 5-HT<sub>6</sub> receptor antagonist. *J. Med. Chem.* 2003; 46: 1273–1276.

Rissman RA, De Blas AL, Armstrong DM. GABA(A) receptors in aging and Alzheimer's disease. *J. Neurochem.* 2007; 103: 1285–1292.

Takata N, Mishima T, Hisatsune C, Nagai T, Ebisui E, Mikoshiba K, et al. Astrocyte calcium signaling transforms cholinergic modulation to cortical plasticity in vivo. *J. Neurosci.* 2011; 31: 18155–18165.

Um JW, Nygaard HB, Heiss JK, Kostylev MA, Stagi M, Vortmeyer A, et al. Alzheimer amyloid-beta oligomer bound to postsynaptic prion protein activates Fyn to impair neurons. *Nat. Neurosci.* 2012; 15: 1227–1235.

Vincent AJ, Gasperini R, Foa L, Small DH. Astrocytes in Alzheimer's disease: emerging roles in calcium dysregulation and synaptic plasticity. *J. Alzheimers. Dis.* 2010; 22: 699–714.
